# Supplementary material for: Placental Delta-Like 1 Gene DNA Methylation Levels Are Related to Mothers’ Blood Glucose Concentration
Source: Hindawi journal article supplement (doi:10.1155/2019/9521510), 2019-12-11
Supplement: f1 [file 9521510.f1.pdf]

**Supplementary Table 1. The characteristic of children at birth and the maternal characteristics.**

| Characteristics                          | Control(n=15) | GDM(n=15)     |
|------------------------------------------|---------------|---------------|
| Maternal age (years)                     | 31.80 ± 3.60  | 32.80 ± 4.36  |
| First trimester BMI (kg/m <sup>2</sup> ) | 22.26 ± 2.30  | 22.70 ± 2.23  |
| Third trimester BMI (kg/m <sup>2</sup> ) | 26.59 ± 3.23  | 27.34 ± 2.86  |
| Weight gain (%)†                         | 26.16 ± 5.28  | 25.41 ± 8.98  |
| Fasting glucose levels (mM)              | 4.13 ± 0.51   | 5.34± 1.45**  |
| 2h-OGTT glucose levels (mM)              | 5.76 ± 1.49   | 8.56 ± 1.78** |
| Birth weight (kg)                        | 3.20 ± 0.43   | 3.61 ± 0.25** |

Data are presented as Mean ± SD.

\*  $P < 0.05$ ; \*\*  $P < 0.01$  vs. Control.

† weight gain between the first trimester and third trimester (% of initial body weight)

**Supplementary Table 2. Nucleotide sequences of primers (human) used for real-time quantitative PCR (SYBR Green)**

| Target RNA | Primers (5' to 3' direction) | Product Size | GeneBank Acc.  |
|------------|------------------------------|--------------|----------------|
| GAPDH      | GGGAAACTGTGGCGTGAT           | 308bp        | NM_008084      |
|            | AAGGTGGAGGAGTGGGTGT          |              |                |
| Dlk1       | CTGAAGGTGTCCATGAAAGAG        | 273bp        | NM_001317172.1 |
|            | GCTGAAGGTGGTCATGTTCGAT       |              |                |

**Supplementary Table3 Nucleotide sequences of primers (human) used for MethylTarget Sequencing**

| Methylation Analysis        | Forward Primer               | Reverse Primer              | Product |
|-----------------------------|------------------------------|-----------------------------|---------|
| Dlk1-1 <sup>st</sup> Primer | GTTAGTTGGGTATGTG<br>TGTTTGTG | ATTACCCAACCATAAAC<br>ATCCTC | 262bp   |
| Dlk1-2 <sup>nd</sup> Primer | GTGTTTTTYGGGGAGG<br>TTTG     | CCCCTCCCCTCRCAAAA<br>C      | 216bp   |
